# Supplementary material for: Recruitment Variability of Coral Reef Sessile Communities of the Far North Great Barrier Reef
Source: PLoS One. 2016 Apr 6;11(4):e0153184. doi: 10.1371/journal.pone.0153184 (PMC4822782; doi:10.1371/journal.pone.0153184)
Supplement: S2 Table — Raw percent cover data for the year 2 sampling (May 2007 to May 2008). (XLSX) [file pone.0153184.s005.xlsx]

## Sheet: Sheet1
Sponges	Ascidians	Byrozoans	Polychaetes	Bivalves	Algae	Diatoms		island	location	depth	site	plate #	year	season
2.5	42.5	7.5	0	12.5	15	0		Masig	1	shallow	1	L1	2	summer
22.5	10	0	2.5	42.5	10	0		Masig	1	shallow	1	L2	2	summer
5	37.5	20	5	2.5	5	0		Masig	1	shallow	1	L3	2	summer
0	25	2.5	5	47.5	15	0		Masig	1	shallow	1	L4	2	summer
5	32.5	12.5	0	7.5	10	0		Masig	1	shallow	1	L5	2	summer
0	42.5	12.5	5	7.5	7.5	0		Masig	1	shallow	2	K1	2	summer
12.5	25	25	0	5	5	0		Masig	1	shallow	2	K2	2	summer
5	40	0	0	5	10	0		Masig	1	shallow	2	K3	2	summer
10	50	0	5	5	7.5	0		Masig	1	shallow	2	K4	2	summer
32.5	22.5	0	0	27.5	2.5	0		Masig	1	shallow	2	K5	2	summer
7.5	57.5	10	0	15	0	0		Masig	1	shallow	3	H1	2	summer
7.5	7.5	12.5	2.5	2.5	42.5	0		Masig	1	shallow	3	H2	2	summer
12.5	30	0	0	20	17.5	0		Masig	1	shallow	3	H3	2	summer
17.5	60	20	0	0	0	0		Masig	1	shallow	3	H4	2	summer
10	42.5	12.5	0	0	10	0		Masig	1	shallow	3	H5	2	summer
0	0	22.5	2.5	2.5	30	0		Masig	2	shallow	4	E1	2	summer
2.5	0	10	2.5	5	45	2.5		Masig	2	shallow	4	E2	2	summer
17.5	7.5	12.5	5	0	27.5	0		Masig	2	shallow	4	E3	2	summer
2.5	0	0	0	0	27.5	0		Masig	2	shallow	4	E4	2	summer
2.5	0	2.5	5	0	27.5	0		Masig	2	shallow	4	E5	2	summer
10	25	0	2.5	15	15	0		Masig	2	shallow	5	D1	2	summer
5	0	0	0	0	37.5	0		Masig	2	shallow	5	D2	2	summer
7.5	0	10	2.5	0	32.5	15		Masig	2	shallow	5	D3	2	summer
0	35	0	0	0	30	0		Masig	2	shallow	5	D4	2	summer
0	10	0	5	5	15	0		Masig	2	shallow	5	D5	2	summer
15	12.5	5	5	2.5	30	0		Masig	2	shallow	6	B1	2	summer
27.5	5	10	2.5	10	15	0		Masig	2	shallow	6	B2	2	summer
62.5	10	5	0	10	7.5	0		Masig	2	shallow	6	B3	2	summer
52.5	0	0	2.5	5	12.5	0		Masig	2	shallow	6	B4	2	summer
40	17.5	17.5	0	0	10	0		Masig	2	shallow	6	B5	2	summer
47.5	15	0	0	0	5	0		Masig	3	shallow	7	M1	2	summer
12.5	5	5	10	5	35	5		Masig	3	shallow	7	M2	2	summer
0	57.5	5	5	5	25	0		Masig	3	shallow	7	M3	2	summer
0	37.5	30	2.5	2.5	17.5	0		Masig	3	shallow	7	M4	2	summer
72.5	0	2.5	0	2.5	15	0		Masig	3	shallow	7	M5	2	summer
2.5	12.5	57.5	10	0	10	0		Masig	3	shallow	8	O1	2	summer
5	20	22.5	12.5	15	15	0		Masig	3	shallow	8	O2	2	summer
2.5	7.5	5	5	50	25	0		Masig	3	shallow	8	O3	2	summer
10	2.5	2.5	2.5	2.5	57.5	0		Masig	3	shallow	8	O4	2	summer
17.5	10	10	5	2.5	47.5	0		Masig	3	shallow	8	O5	2	summer
2.5	2.5	7.5	2.5	35	15	0		Masig	3	shallow	9	Q1	2	summer
0	27.5	17.5	5	22.5	20	0		Masig	3	shallow	9	Q2	2	summer
17.5	7.5	2.5	2.5	0	60	0		Masig	3	shallow	9	Q3	2	summer
17.5	45	25	0	0	12.5	0		Masig	3	shallow	9	Q4	2	summer
57.5	2.5	0	2.5	10	17.5	0		Masig	3	shallow	9	Q5	2	summer
10	0	12.5	2.5	0	50	0		Marsden	4	shallow	10	J1	2	summer
45	0	7.5	0	0	32.5	0		Marsden	4	shallow	10	J2	2	summer
0	0	2.5	5	10	67.5	0		Marsden	4	shallow	10	J3	2	summer
0	20	5	2.5	0	67.5	0		Marsden	4	shallow	10	J4	2	summer
12.5	5	2.5	0	5	75	0		Marsden	4	shallow	10	J5	2	summer
82.5	0	0	0	7.5	2.5	0		Marsden	4	shallow	11	K1	2	summer
10	5	2.5	5	15	32.5	0		Marsden	4	shallow	11	K2	2	summer
20	5	2.5	2.5	7.5	60	0		Marsden	4	shallow	11	K3	2	summer
10	2.5	15	5	7.5	45	2.5		Marsden	4	shallow	11	K4	2	summer
10	2.5	20	5	0	52.5	0		Marsden	4	shallow	11	K5	2	summer
0	0	37.5	5	10	40	0		Marsden	4	shallow	12	L1	2	summer
7.5	2.5	2.5	0	0	87.5	0		Marsden	4	shallow	12	L2	2	summer
7.5	42.5	17.5	2.5	0	0	2.5		Marsden	4	shallow	12	L3	2	summer
5	2.5	60	5	0	15	0		Marsden	4	shallow	12	L4	2	summer
0	5	42.5	5	2.5	42.5	0		Marsden	4	shallow	12	L5	2	summer
12.5	37.5	2.5	0	20	10	2.5		Marsden	5	shallow	13	A1	2	summer
5	90	0	0	0	5	0		Marsden	5	shallow	13	A2	2	summer
27.5	10	55	0	0	7.5	0		Marsden	5	shallow	13	A3	2	summer
5	30	10	0	2.5	50	2.5		Marsden	5	shallow	13	A4	2	summer
5	32.5	5	5	30	2.5	0		Marsden	5	shallow	13	A5	2	summer
40	2.5	12.5	0	45	0	0		Marsden	5	shallow	14	B1	2	summer
35	32.5	12.5	0	5	5	0		Marsden	5	shallow	14	B2	2	summer
15	22.5	15	0	2.5	32.5	0		Marsden	5	shallow	14	B3	2	summer
27.5	27.5	15	2.5	0	5	0		Marsden	5	shallow	14	B4	2	summer
10	12.5	22.5	2.5	2.5	30	0		Marsden	5	shallow	14	B5	2	summer
7.5	22.5	10	5	30	22.5	0		Marsden	5	shallow	15	C1	2	summer
2.5	0	45	5	5	40	0		Marsden	5	shallow	15	C2	2	summer
5	7.5	5	10	0	22.5	2.5		Marsden	5	shallow	15	C3	2	summer
65	7.5	5	0	7.5	2.5	2.5		Marsden	5	shallow	15	C4	2	summer
15	0	20	2.5	0	62.5	0		Marsden	5	shallow	15	C5	2	summer
37.5	17.5	2.5	0	2.5	17.5	0		Marsden	6	shallow	16	M1	2	summer
17.5	22.5	0	0	17.5	10	0		Marsden	6	shallow	16	M2	2	summer
5	7.5	2.5	0	45	10	0		Marsden	6	shallow	16	M3	2	summer
17.5	50	0	0	12.5	7.5	0		Marsden	6	shallow	16	M4	2	summer
12.5	25	30	5	10	15	0		Marsden	6	shallow	16	M5	2	summer
7.5	45	0	2.5	17.5	2.5	0		Marsden	6	shallow	17	N1	2	summer
7.5	7.5	50	5	17.5	12.5	0		Marsden	6	shallow	17	N2	2	summer
5	42.5	12.5	5	17.5	7.5	0		Marsden	6	shallow	17	N3	2	summer
0	5	5	0	7.5	35	0		Marsden	6	shallow	17	N4	2	summer
17.5	22.5	25	0	15	15	0		Marsden	6	shallow	17	N5	2	summer
25	12.5	5	0	42.5	5	0		Marsden	6	shallow	18	O1	2	summer
20	30	5	0	0	2.5	2.5		Marsden	6	shallow	18	O2	2	summer
10	15	2.5	5	27.5	22.5	0		Marsden	6	shallow	18	O3	2	summer
22.5	12.5	0	0	30	22.5	5		Marsden	6	shallow	18	O4	2	summer
5	10	20	2.5	0	20	0		Marsden	6	shallow	18	O5	2	summer
2.5	30	20	7.5	15	12.5	0		Masig	1	deep	1	J1	2	summer
25	12.5	7.5	0	7.5	22.5	0		Masig	1	deep	1	J2	2	summer
47.5	30	0	2.5	5	12.5	0		Masig	1	deep	1	J3	2	summer
0	2.5	82.5	2.5	2.5	5	0		Masig	1	deep	1	J4	2	summer
7.5	0	12.5	2.5	5	35	0		Masig	1	deep	1	J5	2	summer
35	5	42.5	2.5	2.5	7.5	0		Masig	1	deep	2	G1	2	summer
12.5	17.5	0	0	7.5	17.5	2.5		Masig	1	deep	2	G2	2	summer
45	30	0	0	0	5	0		Masig	1	deep	2	G3	2	summer
12.5	0	15	2.5	15	2.5	0		Masig	1	deep	2	G4	2	summer
62.5	22.5	2.5	0	0	2.5	0		Masig	1	deep	2	G5	2	summer
32.5	15	15	2.5	15	2.5	0		Masig	1	deep	3	I1	2	summer
62.5	0	0	0	17.5	2.5	0		Masig	1	deep	3	I2	2	summer
12.5	0	17.5	15	5	17.5	2.5		Masig	1	deep	3	I3	2	summer
30	10	25	2.5	15	10	0		Masig	1	deep	3	I4	2	summer
47.5	0	12.5	2.5	0	15	0		Masig	1	deep	3	I5	2	summer
17.5	0	2.5	10	2.5	20	0		Masig	2	deep	4	F1	2	summer
25	0	25	2.5	2.5	17.5	7.5		Masig	2	deep	4	F2	2	summer
2.5	27.5	12.5	2.5	10	25	2.5		Masig	2	deep	4	F3	2	summer
30	0	17.5	10	5	22.5	2.5		Masig	2	deep	4	F4	2	summer
2.5	37.5	17.5	2.5	2.5	17.5	0		Masig	2	deep	4	F5	2	summer
25	12.5	15	2.5	10	27.5	2.5		Masig	2	deep	5	C1	2	summer
0	30	52.5	2.5	0	12.5	2.5		Masig	2	deep	5	C2	2	summer
10	2.5	12.5	7.5	0	40	25		Masig	2	deep	5	C3	2	summer
100	0	0	0	0	0	0		Masig	2	deep	5	C4	2	summer
0	12.5	7.5	7.5	2.5	35	2.5		Masig	2	deep	5	C5	2	summer
42.5	7.5	20	2.5	0	15	2.5		Masig	2	deep	6	A1	2	summer
97.5	0	0	0	0	0	0		Masig	2	deep	6	A2	2	summer
5	7.5	42.5	5	2.5	25	5		Masig	2	deep	6	A3	2	summer
62.5	12.5	2.5	2.5	10	10	0		Masig	2	deep	6	A4	2	summer
2.5	10	5	2.5	0	17.5	10		Masig	2	deep	6	A5	2	summer
5	50	7.5	0	2.5	15	0		Masig	3	deep	7	N1	2	summer
22.5	60	7.5	0	0	10	0		Masig	3	deep	7	N2	2	summer
7.5	0	22.5	2.5	0	20	0		Masig	3	deep	7	N3	2	summer
7.5	72.5	0	0	0	15	0		Masig	3	deep	7	N4	2	summer
0	40	2.5	0	5	10	0		Masig	3	deep	7	N5	2	summer
35	0	7.5	15	0	15	0		Masig	3	deep	8	P1	2	summer
12.5	0	5	0	0	67.5	2.5		Masig	3	deep	8	P2	2	summer
70	7.5	5	0	0	10	0		Masig	3	deep	8	P3	2	summer
30	0	2.5	2.5	2.5	45	0		Masig	3	deep	8	P4	2	summer
0	0	0	0	0	47.5	0		Masig	3	deep	8	P5	2	summer
5	55	10	2.5	7.5	12.5	0		Masig	3	deep	9	R1	2	summer
35	5	35	2.5	0	15	0		Masig	3	deep	9	R2	2	summer
40	0	20	7.5	0	25	2.5		Masig	3	deep	9	R3	2	summer
12.5	2.5	2.5	0	12.5	42.5	2.5		Masig	3	deep	9	R4	2	summer
12.5	7.5	0	0	12.5	30	2.5		Masig	3	deep	9	R5	2	summer
35	10	10	5	15	25	0		Marsden	4	deep	10	G1	2	summer
40	12.5	10	0	20	10	0		Marsden	4	deep	10	G2	2	summer
65	5	10	5	2.5	10	0		Marsden	4	deep	10	G3	2	summer
82.5	0	0	0	2.5	7.5	0		Marsden	4	deep	10	G4	2	summer
20	37.5	2.5	0	10	10	0		Marsden	4	deep	10	G5	2	summer
55	10	20	2.5	2.5	5	0		Marsden	4	deep	11	H1	2	summer
40	20	2.5	0	5	17.5	0		Marsden	4	deep	11	H2	2	summer
45	7.5	10	0	7.5	2.5	0		Marsden	4	deep	11	H3	2	summer
12.5	45	2.5	0	20	5	0		Marsden	4	deep	11	H4	2	summer
5	70	0	5	15	0	0		Marsden	4	deep	11	H5	2	summer
87.5	0	0	2.5	0	2.5	0		Marsden	4	deep	12	I1	2	summer
47.5	5	2.5	0	42.5	0	0		Marsden	4	deep	12	I2	2	summer
15	15	52.5	10	0	7.5	0		Marsden	4	deep	12	I3	2	summer
35	32.5	17.5	5	0	10	0		Marsden	4	deep	12	I4	2	summer
17.5	25	37.5	2.5	0	15	0		Marsden	4	deep	12	I5	2	summer
37.5	15	10	0	2.5	25	0		Marsden	5	deep	13	D1	2	summer
20	0	0	5	0	65	0		Marsden	5	deep	13	D2	2	summer
12.5	22.5	7.5	0	0	22.5	2.5		Marsden	5	deep	13	D3	2	summer
12.5	2.5	12.5	2.5	2.5	40	5		Marsden	5	deep	13	D4	2	summer
17.5	32.5	5	0	0	20	0		Marsden	5	deep	13	D5	2	summer
17.5	5	22.5	2.5	2.5	22.5	0		Marsden	5	deep	14	E1	2	summer
5	2.5	35	2.5	0	42.5	0		Marsden	5	deep	14	E2	2	summer
12.5	30	5	2.5	0	40	0		Marsden	5	deep	14	E3	2	summer
0	5	5	2.5	2.5	67.5	2.5		Marsden	5	deep	14	E4	2	summer
10	2.5	30	5	10	37.5	0		Marsden	5	deep	14	E5	2	summer
37.5	2.5	7.5	0	0	42.5	5		Marsden	5	deep	15	F1	2	summer
27.5	12.5	2.5	0	2.5	32.5	0		Marsden	5	deep	15	F2	2	summer
0	25	30	2.5	0	30	0		Marsden	5	deep	15	F3	2	summer
20	17.5	10	0	0	30	0		Marsden	5	deep	15	F4	2	summer
2.5	5	2.5	0	5	42.5	0		Marsden	5	deep	15	F5	2	summer
7.5	20	7.5	7.5	0	45	0		Marsden	6	deep	16	P1	2	summer
2.5	15	22.5	0	27.5	20	0		Marsden	6	deep	16	P2	2	summer
2.5	45	7.5	5	2.5	5	0		Marsden	6	deep	16	P3	2	summer
10	30	5	5	17.5	7.5	0		Marsden	6	deep	16	P4	2	summer
2.5	10	0	5	67.5	7.5	0		Marsden	6	deep	16	P5	2	summer
0	27.5	7.5	5	22.5	25	0		Marsden	6	deep	17	Q1	2	summer
2.5	15	5	0	12.5	2.5	0		Marsden	6	deep	17	Q2	2	summer
25	12.5	5	2.5	2.5	5	0		Marsden	6	deep	17	Q3	2	summer
60	17.5	2.5	10	7.5	2.5	0		Marsden	6	deep	17	Q4	2	summer
10	7.5	42.5	0	20	5	0		Marsden	6	deep	17	Q5	2	summer
0	55	7.5	5	25	7.5	0		Marsden	6	deep	18	R1	2	summer
10	10	27.5	0	5	35	0		Marsden	6	deep	18	R2	2	summer
40	10	5	2.5	2.5	35	0		Marsden	6	deep	18	R3	2	summer
37.5	17.5	25	0	2.5	12.5	0		Marsden	6	deep	18	R4	2	summer
0	0	22.5	0	2.5	47.5	15		Marsden	6	deep	18	R5	2	summer
0	25	20	2.5	5	30	0		Masig	1	shallow	1	L1	2	winter
22.5	27.5	20	0	0	7.5	0		Masig	1	shallow	1	L2	2	winter
7.5	15	15	0	2.5	0	5		Masig	1	shallow	1	L3	2	winter
27.5	0	27.5	2.5	2.5	5	0		Masig	1	shallow	1	L4	2	winter
20	7.5	40	0	0	7.5	0		Masig	1	shallow	1	L5	2	winter
0	30	7.5	2.5	0	20	0		Masig	1	shallow	2	K1	2	winter
7.5	27.5	17.5	2.5	2.5	37.5	0		Masig	1	shallow	2	K2	2	winter
7.5	5	62.5	2.5	0	20	0		Masig	1	shallow	2	K3	2	winter
67.5	2.5	2.5	0	2.5	5	0		Masig	1	shallow	2	K4	2	winter
22.5	20	0	0	2.5	27.5	2.5		Masig	1	shallow	2	K5	2	winter
10	20	30	7.5	0	7.5	0		Masig	1	shallow	3	H1	2	winter
2.5	5	42.5	2.5	0	10	0		Masig	1	shallow	3	H2	2	winter
2.5	20	5	2.5	2.5	37.5	0		Masig	1	shallow	3	H3	2	winter
0	12.5	62.5	5	0	10	0		Masig	1	shallow	3	H4	2	winter
7.5	52.5	30	0	0	5	0		Masig	1	shallow	3	H5	2	winter
12.5	0	0	10	0	50	0		Masig	2	shallow	4	E1	2	winter
0	0	2.5	5	0	55	0		Masig	2	shallow	4	E2	2	winter
2.5	0	2.5	2.5	0	47.5	0		Masig	2	shallow	4	E3	2	winter
0	0	50	2.5	7.5	17.5	0		Masig	2	shallow	4	E4	2	winter
0	0	7.5	2.5	7.5	32.5	0		Masig	2	shallow	4	E5	2	winter
2.5	42.5	5	0	0	7.5	0		Masig	2	shallow	5	D1	2	winter
2.5	15	15	2.5	0	5	0		Masig	2	shallow	5	D2	2	winter
5	5	2.5	0	0	42.5	0		Masig	2	shallow	5	D3	2	winter
7.5	7.5	2.5	2.5	0	35	0		Masig	2	shallow	5	D4	2	winter
52.5	10	7.5	0	0	20	0		Masig	2	shallow	5	D5	2	winter
57.5	17.5	2.5	0	5	0	0		Masig	2	shallow	6	B1	2	winter
5	45	22.5	0	0	17.5	0		Masig	2	shallow	6	B2	2	winter
87.5	5	0	0	0	0	0		Masig	2	shallow	6	B3	2	winter
10	27.5	15	20	2.5	7.5	10		Masig	2	shallow	6	B4	2	winter
12.5	25	2.5	0	7.5	7.5	0		Masig	2	shallow	6	B5	2	winter
5	22.5	25	2.5	0	35	0		Masig	3	shallow	7	M1	2	winter
2.5	0	22.5	5	2.5	50	0		Masig	3	shallow	7	M2	2	winter
20	15	25	0	0	27.5	0		Masig	3	shallow	7	M3	2	winter
47.5	45	2.5	0	0	5	0		Masig	3	shallow	7	M4	2	winter
32.5	7.5	22.5	5	0	10	0		Masig	3	shallow	7	M5	2	winter
5	45	2.5	0	0	20	0		Masig	3	shallow	8	O1	2	winter
2.5	45	27.5	2.5	0	22.5	0		Masig	3	shallow	8	O2	2	winter
0	5	0	5	0	65	0		Masig	3	shallow	8	O3	2	winter
50	12.5	2.5	5	0	5	0		Masig	3	shallow	8	O4	2	winter
0	2.5	67.5	0	2.5	25	0		Masig	3	shallow	8	O5	2	winter
2.5	32.5	35	2.5	2.5	22.5	0		Masig	3	shallow	9	Q1	2	winter
7.5	0	25	5	10	32.5	0		Masig	3	shallow	9	Q2	2	winter
52.5	0	20	2.5	5	10	0		Masig	3	shallow	9	Q3	2	winter
0	0	72.5	5	0	17.5	0		Masig	3	shallow	9	Q4	2	winter
17.5	22.5	12.5	2.5	0	30	0		Masig	3	shallow	9	Q5	2	winter
5	2.5	7.5	2.5	2.5	65	0		Marsden	4	shallow	10	J1	2	winter
0	0	7.5	15	2.5	52.5	2.5		Marsden	4	shallow	10	J2	2	winter
2.5	7.5	2.5	30	2.5	37.5	0		Marsden	4	shallow	10	J3	2	winter
12.5	0	10	0	0	60	0		Marsden	4	shallow	10	J4	2	winter
0	27.5	0	2.5	0	55	0		Marsden	4	shallow	10	J5	2	winter
97.5	0	0	0	2.5	0	0		Marsden	4	shallow	11	K1	2	winter
17.5	0	0	0	5	50	0		Marsden	4	shallow	11	K2	2	winter
2.5	2.5	2.5	2.5	2.5	45	0		Marsden	4	shallow	11	K3	2	winter
2.5	25	5	0	2.5	32.5	0		Marsden	4	shallow	11	K4	2	winter
0	0	2.5	5	5	65	0		Marsden	4	shallow	11	K5	2	winter
10	20	17.5	2.5	0	27.5	0		Marsden	4	shallow	12	L1	2	winter
0	55	12.5	5	0	5	0		Marsden	4	shallow	12	L2	2	winter
2.5	17.5	5	0	0	65	0		Marsden	4	shallow	12	L3	2	winter
2.5	7.5	20	12.5	0	30	0		Marsden	4	shallow	12	L4	2	winter
0	20	75	0	0	5	0		Marsden	4	shallow	12	L5	2	winter
62.5	5	5	0	0	15	0		Marsden	5	shallow	13	A1	2	winter
5	57.5	7.5	0	5	17.5	0		Marsden	5	shallow	13	A2	2	winter
42.5	0	10	2.5	2.5	37.5	0		Marsden	5	shallow	13	A3	2	winter
7.5	27.5	2.5	2.5	0	35	0		Marsden	5	shallow	13	A4	2	winter
15	2.5	12.5	5	0	12.5	0		Marsden	5	shallow	13	A5	2	winter
5	52.5	25	0	7.5	10	0		Marsden	5	shallow	14	B1	2	winter
0	62.5	12.5	0	0	12.5	0		Marsden	5	shallow	14	B2	2	winter
7.5	55	2.5	2.5	2.5	20	0		Marsden	5	shallow	14	B3	2	winter
0	7.5	80	2.5	0	10	0		Marsden	5	shallow	14	B4	2	winter
20	25	15	0	0	27.5	0		Marsden	5	shallow	14	B5	2	winter
0	0	47.5	0	5	42.5	0		Marsden	5	shallow	15	C1	2	winter
10	0	25	5	2.5	47.5	0		Marsden	5	shallow	15	C2	2	winter
57.5	20	12.5	0	5	2.5	0		Marsden	5	shallow	15	C3	2	winter
0	30	5	2.5	2.5	47.5	0		Marsden	5	shallow	15	C4	2	winter
12.5	2.5	2.5	5	2.5	32.5	0		Marsden	5	shallow	15	C5	2	winter
25	50	17.5	0	0	7.5	0		Marsden	6	shallow	16	M1	2	winter
12.5	30	7.5	2.5	0	10	0		Marsden	6	shallow	16	M2	2	winter
50	12.5	2.5	7.5	5	2.5	0		Marsden	6	shallow	16	M3	2	winter
0	67.5	7.5	0	0	17.5	0		Marsden	6	shallow	16	M4	2	winter
0	5	7.5	5	5	42.5	0		Marsden	6	shallow	16	M5	2	winter
2.5	27.5	10	0	5	15	0		Marsden	6	shallow	17	N1	2	winter
0	0	52.5	2.5	2.5	30	0		Marsden	6	shallow	17	N2	2	winter
5	32.5	37.5	2.5	5	7.5	0		Marsden	6	shallow	17	N3	2	winter
0	0	22.5	2.5	0	45	0		Marsden	6	shallow	17	N4	2	winter
7.5	20	7.5	5	5	12.5	0		Marsden	6	shallow	17	N5	2	winter
5	52.5	5	2.5	10	7.5	0		Marsden	6	shallow	18	O1	2	winter
22.5	0	0	0	10	20	0		Marsden	6	shallow	18	O2	2	winter
10	67.5	0	2.5	0	5	0		Marsden	6	shallow	18	O3	2	winter
17.5	0	30	2.5	7.5	27.5	0		Marsden	6	shallow	18	O4	2	winter
2.5	0	12.5	0	2.5	0	0		Marsden	6	shallow	18	O5	2	winter
62.5	0	0	2.5	5	12.5	0		Masig	1	deep	1	J1	2	winter
15	17.5	2.5	5	7.5	5	2.5		Masig	1	deep	1	J2	2	winter
17.5	17.5	17.5	0	0	22.5	0		Masig	1	deep	1	J3	2	winter
22.5	20	50	0	0	7.5	0		Masig	1	deep	1	J4	2	winter
0	2.5	5	5	2.5	27.5	2.5		Masig	1	deep	1	J5	2	winter
10	35	15	0	5	0	2.5		Masig	1	deep	2	G1	2	winter
62.5	22.5	5	0	0	5	0		Masig	1	deep	2	G2	2	winter
72.5	0	0	2.5	5	12.5	0		Masig	1	deep	2	G3	2	winter
42.5	22.5	0	2.5	2.5	0	0		Masig	1	deep	2	G4	2	winter
77.5	7.5	7.5	0	0	0	0		Masig	1	deep	2	G5	2	winter
25	0	22.5	2.5	5	37.5	0		Masig	1	deep	3	I1	2	winter
15	5	52.5	0	0	25	0		Masig	1	deep	3	I2	2	winter
85	2.5	2.5	0	0	10	0		Masig	1	deep	3	I3	2	winter
0	2.5	50	7.5	0	25	0		Masig	1	deep	3	I4	2	winter
17.5	22.5	27.5	2.5	2.5	12.5	0		Masig	1	deep	3	I5	2	winter
7.5	17.5	0	0	10	17.5	0		Masig	2	deep	4	F1	2	winter
10	5	0	2.5	2.5	32.5	0		Masig	2	deep	4	F2	2	winter
32.5	2.5	2.5	5	2.5	27.5	0		Masig	2	deep	4	F3	2	winter
0	0	2.5	7.5	0	20	2.5		Masig	2	deep	4	F4	2	winter
0	7.5	10	15	2.5	40	0		Masig	2	deep	4	F5	2	winter
22.5	30	12.5	0	10	7.5	0		Masig	2	deep	5	C1	2	winter
97.5	0	0	0	0	2.5	0		Masig	2	deep	5	C2	2	winter
7.5	15	10	2.5	2.5	32.5	0		Masig	2	deep	5	C3	2	winter
22.5	2.5	15	0	2.5	27.5	0		Masig	2	deep	5	C4	2	winter
0	0	0	7.5	0	37.5	0		Masig	2	deep	5	C5	2	winter
2.5	0	35	5	2.5	37.5	0		Masig	2	deep	6	A1	2	winter
0	0	47.5	0	0	5	0		Masig	2	deep	6	A2	2	winter
5	27.5	27.5	0	0	25	0		Masig	2	deep	6	A3	2	winter
2.5	12.5	15	0	0	7.5	2.5		Masig	2	deep	6	A4	2	winter
87.5	0	0	0	5	0	0		Masig	2	deep	6	A5	2	winter
0	0	40	5	7.5	10	0		Masig	3	deep	7	N1	2	winter
60	10	0	0	0	30	0		Masig	3	deep	7	N2	2	winter
5	20	12.5	2.5	2.5	55	0		Masig	3	deep	7	N3	2	winter
45	0	0	5	0	40	0		Masig	3	deep	7	N4	2	winter
2.5	5	2.5	5	0	52.5	0		Masig	3	deep	7	N5	2	winter
7.5	0	10	7.5	2.5	37.5	0		Masig	3	deep	8	P1	2	winter
5	0	27.5	7.5	2.5	30	0		Masig	3	deep	8	P2	2	winter
0	27.5	0	5	0	30	0		Masig	3	deep	8	P3	2	winter
5	35	0	0	0	55	0		Masig	3	deep	8	P4	2	winter
2.5	20	7.5	0	0	45	0		Masig	3	deep	8	P5	2	winter
75	0	2.5	0	22.5	0	0		Masig	3	deep	9	R1	2	winter
7.5	20	5	0	5	62.5	0		Masig	3	deep	9	R2	2	winter
27.5	30	7.5	5	2.5	12.5	0		Masig	3	deep	9	R3	2	winter
15	0	5	7.5	0	47.5	0		Masig	3	deep	9	R4	2	winter
0	0	0	5	12.5	50	0		Masig	3	deep	9	R5	2	winter
17.5	5	7.5	2.5	0	27.5	0		Marsden	4	deep	10	G1	2	winter
40	7.5	0	0	0	12.5	0		Marsden	4	deep	10	G2	2	winter
7.5	27.5	5	0	7.5	17.5	0		Marsden	4	deep	10	G3	2	winter
10	15	5	7.5	2.5	22.5	0		Marsden	4	deep	10	G4	2	winter
77.5	0	12.5	0	0	5	0		Marsden	4	deep	10	G5	2	winter
0	32.5	30	0	7.5	17.5	0		Marsden	4	deep	11	H1	2	winter
32.5	5	32.5	2.5	2.5	15	0		Marsden	4	deep	11	H2	2	winter
72.5	0	12.5	7.5	0	0	0		Marsden	4	deep	11	H3	2	winter
2.5	72.5	5	0	2.5	17.5	0		Marsden	4	deep	11	H4	2	winter
7.5	27.5	7.5	5	7.5	17.5	0		Marsden	4	deep	11	H5	2	winter
10	12.5	20	7.5	5	17.5	0		Marsden	4	deep	12	I1	2	winter
25	30	2.5	0	2.5	15	0		Marsden	4	deep	12	I2	2	winter
7.5	7.5	2.5	2.5	0	40	0		Marsden	4	deep	12	I3	2	winter
10	52.5	2.5	0	7.5	5	0		Marsden	4	deep	12	I4	2	winter
5	0	5	7.5	0	42.5	0		Marsden	4	deep	12	I5	2	winter
92.5	0	2.5	0	0	5	0		Marsden	5	deep	13	D1	2	winter
2.5	2.5	0	5	2.5	50	2.5		Marsden	5	deep	13	D2	2	winter
5	0	7.5	0	0	17.5	5		Marsden	5	deep	13	D3	2	winter
0	12.5	20	0	0	45	0		Marsden	5	deep	13	D4	2	winter
0	0	7.5	0	0	85	0		Marsden	5	deep	13	D5	2	winter
0	52.5	10	0	2.5	30	0		Marsden	5	deep	14	E1	2	winter
5	17.5	15	0	2.5	50	0		Marsden	5	deep	14	E2	2	winter
27.5	2.5	15	5	0	32.5	0		Marsden	5	deep	14	E3	2	winter
10	15	12.5	0	0	35	0		Marsden	5	deep	14	E4	2	winter
25	5	20	5	5	40	0		Marsden	5	deep	14	E5	2	winter
5	0	55	0	2.5	37.5	0		Marsden	5	deep	15	F1	2	winter
0	2.5	10	0	0	60	0		Marsden	5	deep	15	F2	2	winter
5	0	12.5	0	0	62.5	0		Marsden	5	deep	15	F3	2	winter
5	25	5	2.5	0	35	0		Marsden	5	deep	15	F4	2	winter
0	27.5	5	5	0	40	0		Marsden	5	deep	15	F5	2	winter
32.5	5	7.5	5	5	17.5	0		Marsden	6	deep	16	P1	2	winter
7.5	47.5	5	0	0	35	0		Marsden	6	deep	16	P2	2	winter
87.5	0	0	2.5	5	2.5	0		Marsden	6	deep	16	P3	2	winter
2.5	5	45	0	20	20	0		Marsden	6	deep	16	P4	2	winter
17.5	42.5	7.5	2.5	2.5	5	0		Marsden	6	deep	16	P5	2	winter
2.5	0	5	2.5	5	65	0		Marsden	6	deep	17	Q1	2	winter
55	10	5	2.5	2.5	0	0		Marsden	6	deep	17	Q2	2	winter
7.5	10	57.5	2.5	2.5	17.5	0		Marsden	6	deep	17	Q3	2	winter
2.5	25	2.5	0	0	12.5	0		Marsden	6	deep	17	Q4	2	winter
7.5	5	20	2.5	2.5	5	0		Marsden	6	deep	17	Q5	2	winter
12.5	0	27.5	2.5	10	25	0		Marsden	6	deep	18	R1	2	winter
27.5	0	25	2.5	5	15	0		Marsden	6	deep	18	R2	2	winter
17.5	22.5	20	0	0	22.5	0		Marsden	6	deep	18	R3	2	winter
55	0	2.5	2.5	10	7.5	0		Marsden	6	deep	18	R4	2	winter
2.5	0	2.5	7.5	2.5	42.5	2.5		Marsden	6	deep	18	R5	2	winter
